# Supplementary material for: DNA Methylation as an Early Indicator of Aging in Stored Seeds of “Exceptional” Species Populus nigra L
Source: MDPI journal article supplement (doi:10.3390/cells11132080), 2022-06-30
Supplement: s1 [file s1]

**Supplementary Equation S1.** Method of  $\Delta\%$  5mC calculation.

X = % 5mC at 95% germination calculated by p.dose from GLM model (control)

Y = % 5mC at one of the arbitrary chosen percentage of germination calculated by p.dose from GLM model.

$$Z = Y/X \times 100\% \quad (S1)$$

$$\Delta = 100\% - z \quad (S2)$$

Calculated  $\Delta$  was plotted on x axis. Germination (%) was plotted on y axis.

**Supplementary Table S1.** AIC (Akaike information criterion) and coefficients of constructed GLM models for all seeds, non-desiccated seeds at the MC range 12.5–14.5% and desiccated seeds at the MC range 7.6–7.8%.

| Models         | Null Deviance on Degrees of Freedom | AIC    | Coefficients of GLM Models |            |         |          |
|----------------|-------------------------------------|--------|----------------------------|------------|---------|----------|
|                |                                     |        | Estimate                   | Std. Error | z Value | Pr(> z ) |
| All seeds      | 100.375 on 119                      | 73.605 | 1.8068                     | 0.3193     | 5.658   | 1.53e-08 |
| Non-desiccated | 60.186 on 59                        | 41.184 | 2.4225                     | 0.6083     | 3.982   | 6.82e-05 |
| Desiccated     | 35.396 on 59                        | 34.459 | 1.5170                     | 0.4155     | 3.651   | 0.000261 |

**Supplementary Table S2.** Calculated relative DNA methylation level changes (% $\Delta$ ) based on GLM models.

| Assumed Germination Level | All Seeds | Non-desiccated Seeds | Desiccated Seeds |
|---------------------------|-----------|----------------------|------------------|
| 95%                       | 0%        | 0%                   | 0%               |
| 90%                       | 10.004%   | 8.546%               | 10.071%          |
| 80%*                      | 14.792%   | 12.880%              | 15.565%          |
| 50%                       | 22.976%   | 18.891%              | 24.967%          |
| 25%                       | 29.462%   | 24.070%              | 32.415%          |
| 10%                       | 35.948%   | 29.237%              | 39.873%          |
| 5%                        | 40.359%   | 32.761%              | 44.934%          |

**Supplementary Table S3.** The relationship between germination (%) and ( $\Delta\%$ ) 5mC. Slopes indicate the percentage of germination change when relative ( $\Delta\%$ ) 5mC level changes by 1%.

|                                                 | All seeds                           | Non-desiccated                      | Desiccated                          |
|-------------------------------------------------|-------------------------------------|-------------------------------------|-------------------------------------|
| Slope of asymptomatic changes <sup>1</sup>      | -0.448<br>(R <sup>2</sup> = 0.9266) | -0.521<br>(R <sup>2</sup> = 0.9214) | -0.496<br>(R <sup>2</sup> = 0.8663) |
| Slope of rapid loss of germination <sup>2</sup> | -3.784<br>(R <sup>2</sup> = 0.9994) | -4.885<br>(R <sup>2</sup> = 0.9998) | -3.295<br>(R <sup>2</sup> = 0.9994) |

<sup>1</sup> Assessed between 95% and 90% of germination, <sup>2</sup> Assessed between 80 and 25% of germination.
